# Supplementary material
Source: publisher figshare collection journal article supplement (https://karger.figshare.com/articles/dataset/_/7241267)
Supplement: Supplementary file 1 [file 1]

Archive with 2 entries (2 files):
- NEF492603_FigS1.pdf
- NEF492603_TableS1-S2.pdf
