# Supplementary material
Source: publisher figshare collection journal article supplement (https://karger.figshare.com/articles/dataset/_/7241267)

**Supplementary Figure S1.** Sensitivity analysis: Kaplan–Meier analysis for time to all-cause mortality for the subgroup of primary comparator patients who also had at least 12 consecutive weeks of phosphate-binder therapy compared with the exposed cohort.

The sensitivity analysis was only performed for the comparison between patients in the exposed and primary comparator cohorts. The horizontal reference line indicates the median. CI, confidence interval; LaC, lanthanum carbonate.

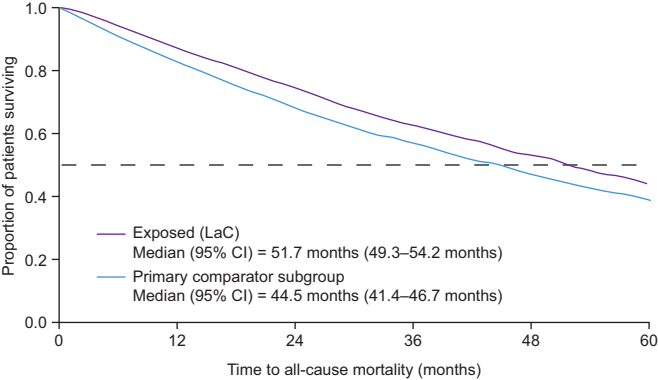

Supplement: Supplementary file 1 [file 1 › NEF492603_FigS1.pdf]
