# Supplementary material
Source: publisher figshare collection journal article supplement (https://karger.figshare.com/articles/dataset/_/7241267)
Supplement: Supplementary file 1 [file 1 › NEF492603_TableS1-S2.pdf]

## Supplementary Material

**Supplementary Table S1.** List of ICD-9 diagnosis codes used for the primary and secondary outcomes

| Diagnosis code (ICD-9) | Definition                                                                                                      |
|------------------------|-----------------------------------------------------------------------------------------------------------------|
| Primary outcomes       |                                                                                                                 |
| Bone fractures         |                                                                                                                 |
| 733.1                  | Pathologic fracture                                                                                             |
| 812                    | Fracture of humerus                                                                                             |
| 813                    | Fracture of radius and ulna                                                                                     |
| 819                    | Multiple fractures involving both upper limbs, and upper limb with rib(s) and sternum                           |
| 820                    | Fracture of neck of femur                                                                                       |
| 821                    | Fracture of other and unspecified parts of femur                                                                |
| 823                    | Fracture of tibia and fibula                                                                                    |
| 827                    | Other, multiple, and ill-defined fractures of lower limb                                                        |
| 828                    | Multiple fractures involving both lower limbs, lower with upper limb, and lower limb(s) with rib(s) and sternum |
| Secondary outcomes     |                                                                                                                 |
| Hepatic morbidity      |                                                                                                                 |
| 570                    | Acute and sub-acute necrosis of the liver                                                                       |
| 571.4                  | Chronic hepatitis                                                                                               |
| 571.5                  | Cirrhosis of liver without mention of alcohol                                                                   |
| 571.6                  | Biliary cirrhosis                                                                                               |
| 571.8                  | Other chronic non-alcoholic liver disease                                                                       |
| 573.3                  | Hepatitis, unspecified                                                                                          |
| 573.4                  | Hepatic infarction                                                                                              |
| GI morbidity           |                                                                                                                 |
| 531                    | Gastric ulcer                                                                                                   |
| 532                    | Duodenal ulcer                                                                                                  |
| 533                    | Peptic ulcer, site unspecified                                                                                  |
| 534                    | Gastrojejunal ulcer                                                                                             |
| 535.2                  | Gastric mucosal hypertrophy                                                                                     |
| 535.4                  | Other specified gastritis                                                                                       |
| 558.2                  | Toxic gastroenteritis and colitis                                                                               |
| 560.3                  | Impaction of intestine, unspecified                                                                             |
| 560.9                  | Unspecified intestinal obstruction                                                                              |
| 569.82                 | Ulceration of intestine                                                                                         |
| 569.83                 | Perforation of intestine                                                                                        |
| 578                    | Gastrointestinal hemorrhage                                                                                     |
| 579.9                  | Unspecified intestinal malabsorption                                                                            |
| Malignancy morbidity   |                                                                                                                 |
| 150                    | Malignant neoplasm of esophagus                                                                                 |
| 151                    | Malignant neoplasm of stomach                                                                                   |
| 152                    | Malignant neoplasm of small intestine, including duodenum                                                       |
| 153                    | Malignant neoplasm of colon                                                                                     |
| 154                    | Malignant neoplasm of rectum, rectosigmoid junction, and anus                                                   |
| 155                    | Malignant neoplasm of liver and intrahepatic bile ducts                                                         |
| 156                    | Malignant neoplasm of gallbladder and extrahepatic bile ducts                                                   |
| 159                    | Malignant neoplasm of other and ill-defined sites within the digestive organs and peritoneum                    |
| Infection morbidity    |                                                                                                                 |

|     |                                                                                                  |
|-----|--------------------------------------------------------------------------------------------------|
| 003 | Other salmonella infections, including: infection or food poisoning by Salmonella (any serotype) |
| 004 | Shigellosis includes: bacillary dysentery                                                        |
| 005 | Other food poisoning (bacterial)                                                                 |
| 006 | Amebiasis                                                                                        |
| 007 | Other protozoal intestinal diseases                                                              |
| 008 | Intestinal infections due to other organisms                                                     |
| 009 | Ill-defined intestinal infections                                                                |
| 038 | Septicemia                                                                                       |
| 041 | Bacterial infection in conditions classified elsewhere and of unspecified site                   |

---

GI, gastrointestinal; ICD-9, International Classification of Diseases, Ninth Revision.

**Supplementary Table S2.** Summary of US region categories<sup>a</sup>

| Region                          | US states / territories                                                                                                                                                                                                                                                                                                                                                                                                                                                          |
|---------------------------------|----------------------------------------------------------------------------------------------------------------------------------------------------------------------------------------------------------------------------------------------------------------------------------------------------------------------------------------------------------------------------------------------------------------------------------------------------------------------------------|
| East North Central              | Illinois, Indiana, Michigan, Ohio, Wisconsin                                                                                                                                                                                                                                                                                                                                                                                                                                     |
| East South Central              | Alabama, Kentucky, Mississippi, Tennessee                                                                                                                                                                                                                                                                                                                                                                                                                                        |
| Middle Atlantic and New England | Connecticut, Maine, Massachusetts, New Hampshire, New Jersey, New York, Pennsylvania, Rhode Island, Vermont                                                                                                                                                                                                                                                                                                                                                                      |
| Mountain                        | Arizona, Colorado, Idaho, Montana, New Mexico, Nevada, Utah, Wyoming                                                                                                                                                                                                                                                                                                                                                                                                             |
| Pacific                         | Alaska, California, Hawaii, Oregon, Washington                                                                                                                                                                                                                                                                                                                                                                                                                                   |
| South Atlantic                  | District of Columbia, Delaware, Florida, Georgia, Maryland, North Carolina, South Carolina, Virginia, West Virginia                                                                                                                                                                                                                                                                                                                                                              |
| West North Central              | Iowa, Kansas, Minnesota, Missouri, North Dakota, Nebraska, South Dakota                                                                                                                                                                                                                                                                                                                                                                                                          |
| West South Central              | Arkansas, Louisiana, Oklahoma, Texas                                                                                                                                                                                                                                                                                                                                                                                                                                             |
| Other/unknown                   | American Samoa, Baker Island, Canton/Enderbury Islands, Foreign (SSA state code), Guam, Howland Island, Jarvis Island, Johnston Atoll, Kingman Reef, Marshall Islands, Micronesia, Midway Island, Minor Islands, North Mariana Islands, Oceania (SSA state code), Pacific Trust Territories, Palau, Palmyra Atoll, Panama Canal Zone, Puerto Rico, unknown state, US Caribbean Islands, US miscellaneous Pacific Islands, US poss. (SSA state code), Virgin Islands, Wake Island |

<sup>a</sup>These geographical regions were included as a covariate term in the CPH model.

CPH, Cox proportional hazards; SSA, Social Security Administration.
